# Supplementary material for: Ce Filling Limit and Its Influence on Thermoelectric Performance of Fe3CoSb12-Based Skutterudite Grown by a Temperature Gradient Zone Melting Method
Source: MDPI journal article supplement (doi:10.3390/ma14226810), 2021-11-11
Supplement: s1 [file s1]

# Ce Filling Limit and Its Influence on Thermoelectric Performance of $\text{Fe}_3\text{CoSb}_{12}$ -Based Skutterudite Grown by a Temperature Gradient Zone Melting Method

Xu-Guang Li <sup>1,†</sup>, Wei-Di Liu <sup>2,3,†</sup>, Shuang-Ming Li <sup>1,\*</sup>, Dou Li <sup>1</sup>, Jia-Xi Zhu <sup>1</sup>, Zhen-Yu Feng <sup>1</sup>, Bin Yang <sup>1</sup>, Hong Zhong <sup>1</sup>, Xiao-Lei Shi <sup>3,4</sup> and Zhi-Gang Chen <sup>3,4,\*</sup>

<sup>1</sup> State Key Laboratory of Solidification Processing, Northwestern Polytechnical University, Xi'an 710072, China; leexuguang@mail.nwpu.edu.cn (X.-G.L.); lidou@mail.nwpu.edu.cn (D.L.); zhujx1107@mail.nwpu.edu.cn (J.-X.Z.); fengzhenyu97@mail.nwpu.edu.cn (Z.-Y.F.); 2016100413yb@mail.nwpu.edu.cn (B.Y.); zhonghong123@nwpu.edu.cn (H.Z.)

<sup>2</sup> Australian Institute of Bioengineering and Nanotechnology, The University of Queensland, Brisbane, QLD 4072, Australia; weidi.liu@uq.net.au

<sup>3</sup> Centre for Future Materials, University of Southern Queensland, Brisbane, QLD 4300, Australia; xiaolei.shi@usq.edu.au

<sup>4</sup> School of Mechanical and Mining Engineering, The University of Queensland, Brisbane, QLD 4072, Australia

\* Correspondence: lsm@nwpu.edu.cn (S.-M.L.); zhigang.chen@usq.edu.au (Z.-G.C.)

<sup>†</sup> These authors contributed equally to this work.

**Keywords:** Skutterudite;  $\text{CoSb}_3$ ; Ce-filling; Thermoelectric

## 1. Comparison of the maximum $zT$ value

**Figure S1** compares the maximum  $zT$  values of nominal  $\text{Ce}_{1.25}\text{Fe}_3\text{CoSb}_{12}$  in this study prepared by TGZM with the reported  $zT$  of p-type Ce-filled and Fe-doped  $\text{CoSb}_3$  prepared by other methods. As can be seen, our obtained  $zT$  value is comparable to  $\text{Ce}_{0.6}\text{Fe}_3\text{CoSb}_{12}$  and  $\text{Ce}_{0.6}\text{Fe}_3\text{CoSb}_{12}$  prepared by traditional melting (TM) method. Besides, a higher  $zT$  value can be obtained by optimizing Ce-filling fraction and Fe/Co ratio.

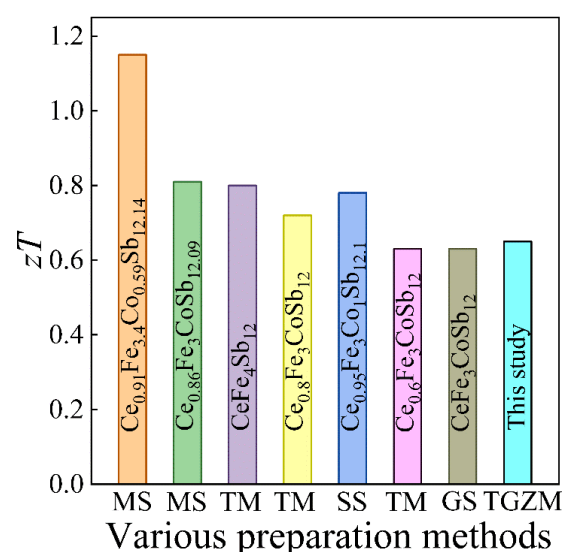

**Figure S1.** Comparison of the maximum  $zT$  value for nominal  $\text{Ce}_{1.25}\text{Fe}_3\text{CoSb}_{12}$  with the reported values for  $\text{Ce}_{0.91}\text{Fe}_{3.4}\text{Co}_{0.59}\text{Sb}_{12.14}$  [1] and  $\text{Ce}_{0.86}\text{Fe}_3\text{CoSb}_{12.09}$  [2] prepared by melt spinning and spark plasma sintering (MS),  $\text{CeFe}_4\text{Sb}_{12}$  [3]  $\text{Ce}_{0.6}\text{Fe}_3\text{CoSb}_{12}$  and  $\text{Ce}_{0.8}\text{Fe}_3\text{CoSb}_{12}$  [4] prepared by traditional

melting (TM),  $\text{CeFe}_3\text{CoSb}_{12}$  [5] prepared by gas-atomized powder sintering (GS),  $\text{Ce}_{0.95}\text{Fe}_3\text{CoSb}_{12.1}$  [6] prepared by scanning laser melting and spark plasma sintering SS.

## References

1. Lee, S.; Lee, K.H.; Kim, Y.M.; Kim, H.S.; Snyder, G.J.; Baik, S.; Kim, S.W. Simple and efficient synthesis of nanograin structured single phase filled skutterudite for high thermoelectric performance. *Acta Mater.* **2018**, *142*, 8–17.
2. Bae, S.H.; Lee, K.H.; Choi, S.-M. Effective role of filling fraction control in p-type  $\text{Ce}_x\text{Fe}_3\text{CoSb}_{12}$  skutterudite thermoelectric materials. *Intermetallics* **2019**, *105*, 44–47.
3. Tan, G.; Liu, W.; Wang, S.; Yan, Y.; Li, H.; Tang, X.; Uher, C. Rapid preparation of  $\text{CeFe}_4\text{Sb}_{12}$  skutterudite by melt spinning: Rich nanostructures and high thermoelectric performance. *J. Mater. Chem. A* **2013**, *1*, 12657–12668.
4. Tan, G.J.; Wang, S.Y.; Tang, X.F. Thermoelectric Performance Optimization in p-Type  $\text{Ce}_x\text{Fe}_3\text{CoSb}_{12}$  Skutterudites. *J. Electron. Mater.* **2014**, *43*, 1712–1717.
5. Tanahashi, H.; Ohta, Y.; Uchida, H.; Itsumi, Y.; Kasama, A.; Matsubara, K. Formation of cerium-filled skutterudite thermoelectric materials in the sintering of gas-atomized powder. *J. Jpn. Inst. Metals* **2001**, *65*, 955–960.
6. Chen, F.; Liu, R.; Yao, Z.; Xing, Y.; Bai, S.; Chen, L. Scanning laser melting for rapid and massive fabrication of filled skutterudites with high thermoelectric performance. *J. Mater. Chem. A* **2018**, *6*, 6772–6779.
